# Supplementary material
Source: PubMed Central journal article supplement (PMC1150817)

+CHX

LPS

LPS+

LPS

LPS+

IL-10

IL-10

0

60

120

0

60

120

0

60

120

0

60

120

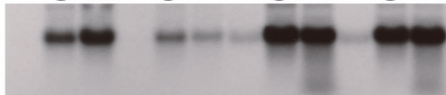

TNF- $\alpha$

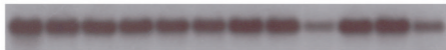

GAPDH

Supplement: pnas_0500419102_3.pdf [file pnas_0500419102_3.pdf]
